# Supplementary material
Source: PubMed Central journal article supplement (PMC7335425)
Supplement: NIHMS1587791-supplement-1.pdf [file NIHMS1587791-supplement-1.pdf]

## Data S1

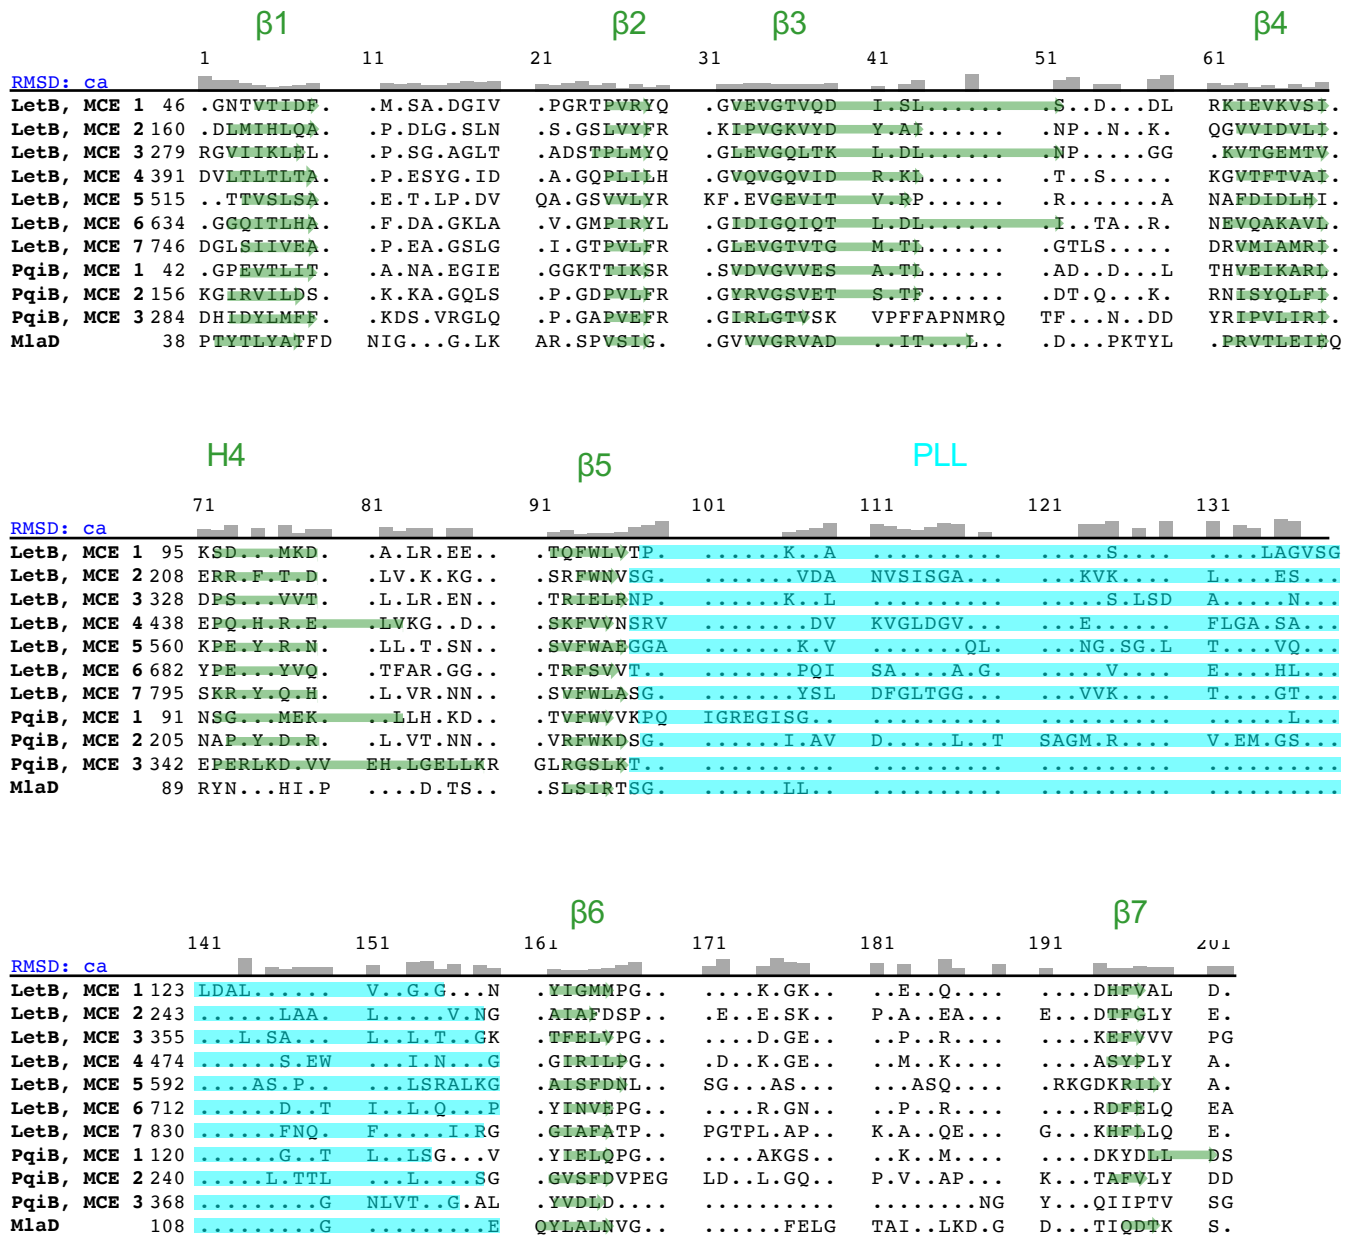

### Data S1. Structure-based sequence comparison of MCE domains from *E. coli*, Related to Figure 1.

Alignment of the *E. coli* MCE domains from MlaD, PqiB and LetB proteins, generated using the using Matchmaker within Chimera (Meng et al., 2006). The MCE domains were aligned on the core domains, and the resulting structure-based alignment of the sequences is displayed here.  $\beta$ -strands and  $\alpha$ -helix 4 (H4) of the core domains are shown in green (start and end points visually estimated approximately from the structures), and the pore-lining loops (PLL) in cyan.
