# Supplementary material
Source: PubMed Central journal article supplement (PMC7335425)
Supplement: NIHMS1587791-supplement-9.pdf [file NIHMS1587791-supplement-9.pdf]

**Table S1: Data collection and refinement statistics for cryo EM structure of LetB, Related to Figure 1.**

| <b>Data collection</b>                                |           |
|-------------------------------------------------------|-----------|
| pixel size (Å):                                       | 1.31      |
| electron energy (kV):                                 | 300       |
| electron dose (e-/Å <sup>2</sup> /px):                | 10        |
| total electron dose (e-/Å <sup>2</sup> ):             | 80        |
| number of frames in each movie:                       | 50        |
| images acquired:                                      | 4905      |
| number of particles picked:                           | 731,231   |
| number of particles selected after 2D classification: | 534,003   |
| pixel dimension of individual windows:                | 280 x 280 |

  

|                           | <b>Map 1</b>   | <b>Map 2</b>   |
|---------------------------|----------------|----------------|
|                           | <b>Model 1</b> | <b>Model 2</b> |
| Number of particles:      | 61,618         | 57,157         |
| Resolution (Å), Relion:   | 3.46           | 3.49           |
| Sphericity of 3DFSC:      | 0.981          | 0.980          |
| Map CC:                   | 0.793          | 0.781          |
| rmsd (bonds):             | 0.01           | 0.01           |
| rmsd (angles):            | 1.28           | 1.18           |
| All-atom clashscore       | 3.86           | 3.96           |
| Ramachandran plot values: |                |                |
| outliers:                 | 0.00 %         | 0.00 %         |
| allowed:                  | 2.71 %         | 2.29 %         |

|                                  |                |                |                |
|----------------------------------|----------------|----------------|----------------|
| favored:                         | 97.29 %        | 97.71 %        |                |
| Rotamer outliers:                | 0.00 %         | 0.00 %         |                |
| C-beta deviations:               | 0              | 0              |                |
| Overall score (Molprobit):       | 1.31           | 1.25           |                |
| EMRinger Score:                  | 3.14           | 2.82           |                |
| Deposition:                      |                |                |                |
| PDB ID:                          | 6V0C           | 6V0D           |                |
| EMDB ID:                         | EMD-20993      | EMD-20994      |                |
|                                  | <b>Map 3</b>   | <b>Map 4</b>   | <b>Map 5</b>   |
| <b>Composite closed model 9:</b> | <b>Model 3</b> | <b>Model 4</b> | <b>Model 5</b> |
| Number of particles:             | 101,464        | 144,219        | 147,415        |
| Resolution (Å), Relion:          | 3.06           | 2.96           | 3.03           |
| Sphericity of 3DFSC:             | 0.978          | 0.989          | 0.990          |
| Map CC:                          | 0.796          | 0.800          | 0.806          |
| rmsd (bonds):                    | 0.01           | 0.01           | 0.01           |
| rmsd (angles):                   | 1.24           | 1.17           | 1.16           |
| All-atom clashscore              | 5.69           | 4.35           | 6.08           |
| Ramachandran plot values:        |                |                |                |
| outliers:                        | 0.00 %         | 0.00 %         | 0.00 %         |
| allowed:                         | 5.31 %         | 1.43 %         | 2.40 %         |
| favored:                         | 94.69 %        | 98.57 %        | 97.60 %        |
| Rotamer outliers:                | 0.00 %         | 0.00 %         | 0.00 %         |
| C-beta deviations:               | 0              | 0              | 0              |
| Overall score (Molprobit):       | 1.68           | 1.21           | 1.42           |

|                                   |                |                |                |
|-----------------------------------|----------------|----------------|----------------|
| EMRinger Score:                   | 3.32           | 2.98           | 3.01           |
| Deposition:                       |                |                |                |
| PDB ID:                           | 6V0E           | 6V0F           | 6V0G           |
| EMDB ID:                          | EMD-20995      | EMD-20996      | EMD-20997      |
|                                   | <b>Map 6</b>   | <b>Map 7</b>   | <b>Map 8</b>   |
| <b>Composite closed model 10:</b> | <b>Model 6</b> | <b>Model 7</b> | <b>Model 8</b> |
| Number of particles:              | 71,235         | 59,687         | 21,149         |
| Resolution (Å), Relion:           | 3.60           | 3.43           | 3.78           |
| Sphericity of 3DFSC:              | 0.986          | 0.958          | 0.967          |
| Map CC:                           | 0.722          | 0.789          | 0.814          |
| rmsd (bonds):                     | 0.01           | 0.01           | 0.01           |
| rmsd (angles):                    | 1.16           | 1.33           | 1.19           |
| All-atom clashscore               | 4.20           | 4.38           | 5.14           |
| Ramachandran plot values:         |                |                |                |
| outliers:                         | 0.00 %         | 0.00 %         | 0.25 %         |
| allowed:                          | 4.25 %         | 1.15 %         | 5.76 %         |
| favored:                          | 95.75 %        | 98.85 %        | 93.99 %        |
| Rotamer outliers:                 | 0.00 %         | 0.00 %         | 0.00 %         |
| C-beta deviations:                | 0              | 0              | 0              |
| Overall score (Molprobit):        | 1.50           | 1.22           | 1.68           |
| EMRinger Score:                   | 2.34           | 1.22           | 1.68           |
| Deposition:                       |                |                |                |
| PDB ID:                           | 6V0H           | 6V0I           | 6V0J           |
| EMDB ID:                          | EMD-20998      | EMD-20999      | EMD-21000      |

**Table S2: Pairwise percent identity between all MCE domains (from ClustalO), Related to Figure 1.**

|      |            | <i>residues</i> | LetB  |       |       |       |       |       |       | PqiB  |       |       | MlaD  |
|------|------------|-----------------|-------|-------|-------|-------|-------|-------|-------|-------|-------|-------|-------|
|      |            |                 | MCE 1 | MCE 2 | MCE 3 | MCE 4 | MCE 5 | MCE 6 | MCE 7 | MCE 1 | MCE 2 | MCE 3 | MCE 1 |
| LetB | MCE1       | 46-149          | 100   | 19.4  | 29.7  | 17.4  | 20.0  | 28.4  | 24.3  | 37.5  | 23.3  | 18.9  | 21.4  |
|      | MCE2       | 158-272         |       | 100   | 14.6  | 28.4  | 28.8  | 15.4  | 32.2  | 19.1  | 29.6  | 17.5  | 17.4  |
|      | MCE3       | 279-382         |       |       | 100   | 16.5  | 15.2  | 29.7  | 24.3  | 19.4  | 19.4  | 12.1  | 14.8  |
|      | MCE4       | 391-499         |       |       |       | 100   | 21.9  | 17.4  | 26.6  | 18.2  | 18.4  | 13.2  | 24.2  |
|      | MCE5       | 513-625         |       |       |       |       | 100   | 16.0  | 24.6  | 20.8  | 29.0  | 15.8  | 17.7  |
|      | MCE6       | 634-737         |       |       |       |       |       | 100   | 20.2  | 26.9  | 18.3  | 11.1  | 11.4  |
|      | MCE7       | 746-862         |       |       |       |       |       |       | 100   | 21.9  | 33.1  | 21.2  | 20.4  |
| PqiB | MCE1       | 42-147          |       |       |       |       |       |       |       | 100   | 21.9  | 12.1  | 13.5  |
|      | MCE2       | 156-273         |       |       |       |       |       |       |       |       | 100   | 23.2  | 21.4  |
|      | MCE3       | 284-412         |       |       |       |       |       |       |       |       |       | 100   | 18.9  |
| MlaD | MCE1       | 38-139          |       |       |       |       |       |       |       |       |       |       | 100   |
|      | <i>min</i> |                 | 17.4  | 14.6  | 12.1  | 13.2  | 15.2  | 11.1  | 20.2  | 12.1  | 18.3  | 11.1  | 11.4  |
|      | <i>avg</i> |                 | 24.0  | 22.2  | 19.6  | 20.2  | 21.0  | 19.5  | 24.9  | 21.1  | 23.7  | 16.4  | 18.1  |
|      | <i>max</i> |                 | 37.5  | 32.2  | 29.7  | 28.4  | 29.0  | 29.7  | 33.1  | 37.5  | 33.1  | 23.2  | 24.2  |

**Table S3: Data collection and refinement statistics of LetB MCE2-MCE3 crystal structure, Related to Figure S5 and Figure 4.**

---

| <b>Data collection</b>                                   |                                     |
|----------------------------------------------------------|-------------------------------------|
| Space group:                                             | <b>P6<sub>5</sub></b>               |
| Cell dimensions:                                         |                                     |
| a, b, c (Å):                                             | 87.56, 87.56, 116.99                |
| α, β, γ (°):                                             | 90, 90, 120                         |
| Resolution (Å):                                          | 46.32-2.15 (2.21-2.15) <sup>1</sup> |
| Wavelength (Å):                                          | 1.0000                              |
| Observations:                                            | 259,635                             |
| Unique Reflections:                                      | 27,654                              |
| Redundancy:                                              | 9.4 (4.8)                           |
| Completeness (%):                                        | 99.8 (97.4)                         |
| CC1/2:                                                   | 1.00 (0.62)                         |
| <i>I</i> / <i>σ</i> <i>I</i> :                           | 21.3 (1.2)                          |
| <i>R</i> <sub>meas</sub> :                               | 0.05 (1.26)                         |
| <b>Refinement</b>                                        |                                     |
| Resolution (Å):                                          | 41.0 - 2.15                         |
| Reflections (work):                                      | 26,145                              |
| Reflections (free):                                      | 1,321                               |
| <i>R</i> <sub>work</sub> / <i>R</i> <sub>free</sub> (%): | 21.4 / 24.4                         |
| No. atoms:                                               |                                     |
| Protein:                                                 | 3,263                               |
| Water:                                                   | 48                                  |
| Other:                                                   | 0                                   |

Mean B-factor:

Protein: 84.1

Water: 61.8

R.M.S. Deviations:

Bond lengths (Å): 0.003

Bond angles (°): 0.56

Ramachandran plot:

Favored: 97.2 %

Outliers: 0.2 %

Rotamer outliers: 0.56 %

Molprobity:

Molprobity score: 1.17

Percentile: 100<sup>th</sup>

All-atom clashscore: 2.44

Percentile: 99<sup>th</sup>

PDB ID: 6VCI

---

<sup>1</sup> Values in parentheses are for highest-resolution shell.
