# Supplementary material
Source: PubMed Central journal article supplement (PMC7335425)

**Figure S1**

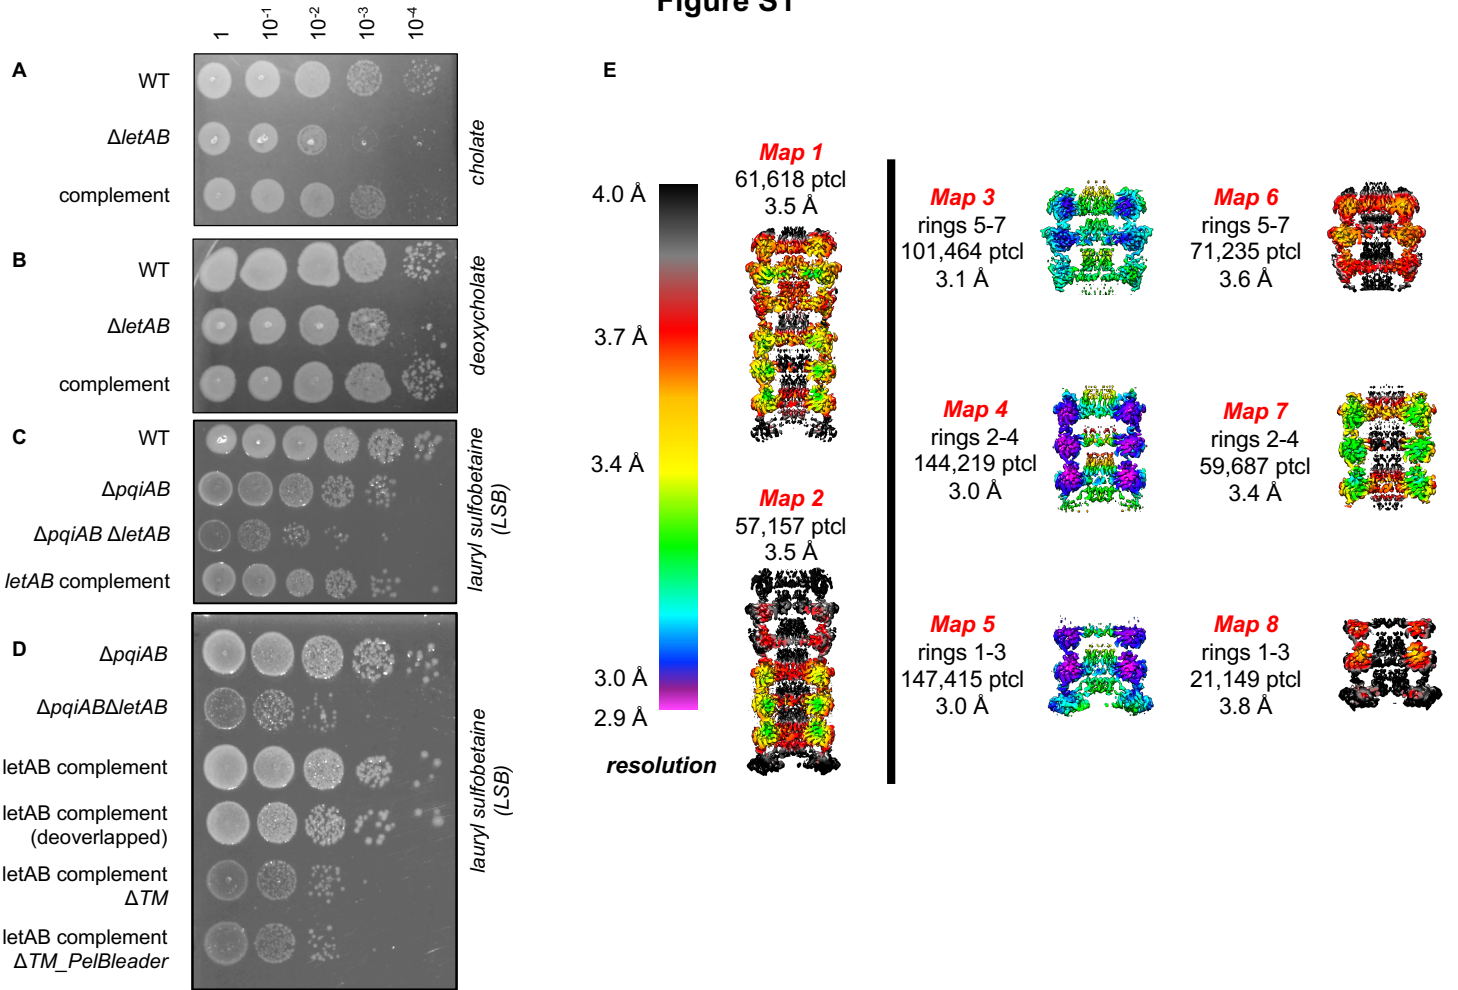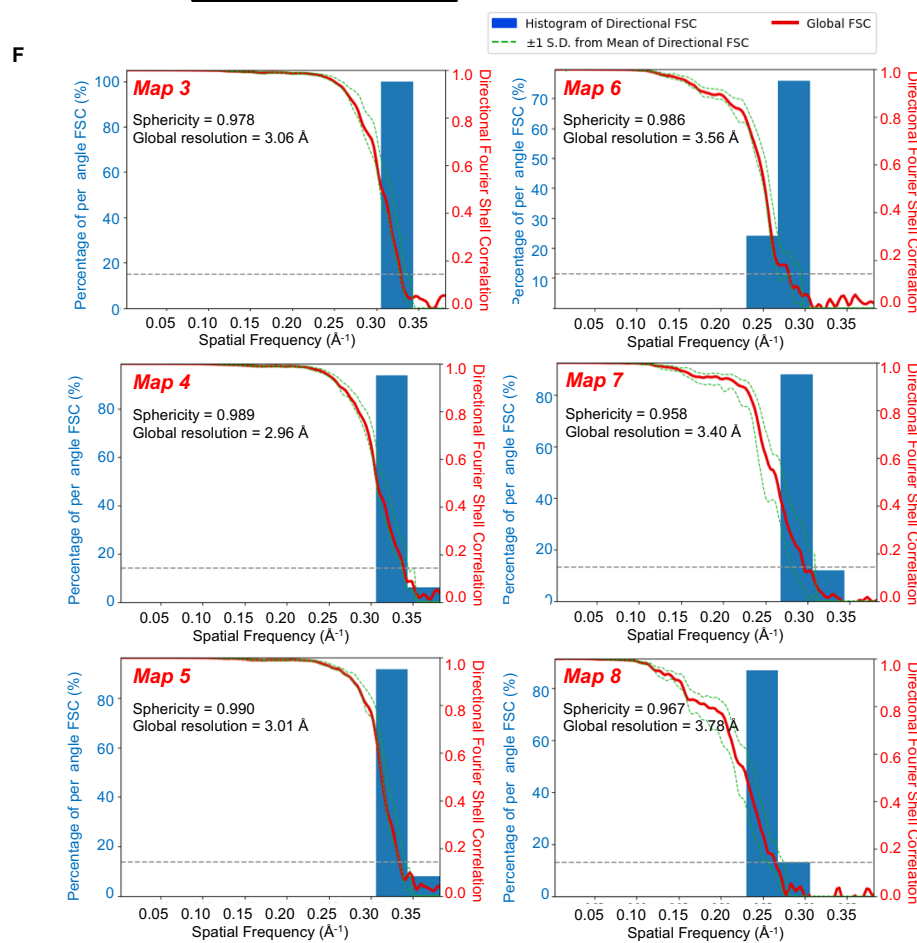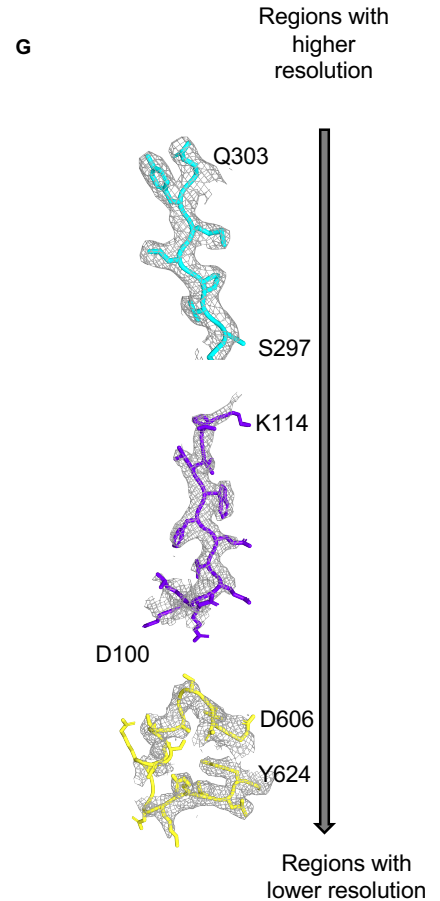

Supplement: NIHMS1587791-supplement-2.pdf [file NIHMS1587791-supplement-2.pdf]

Figure S2

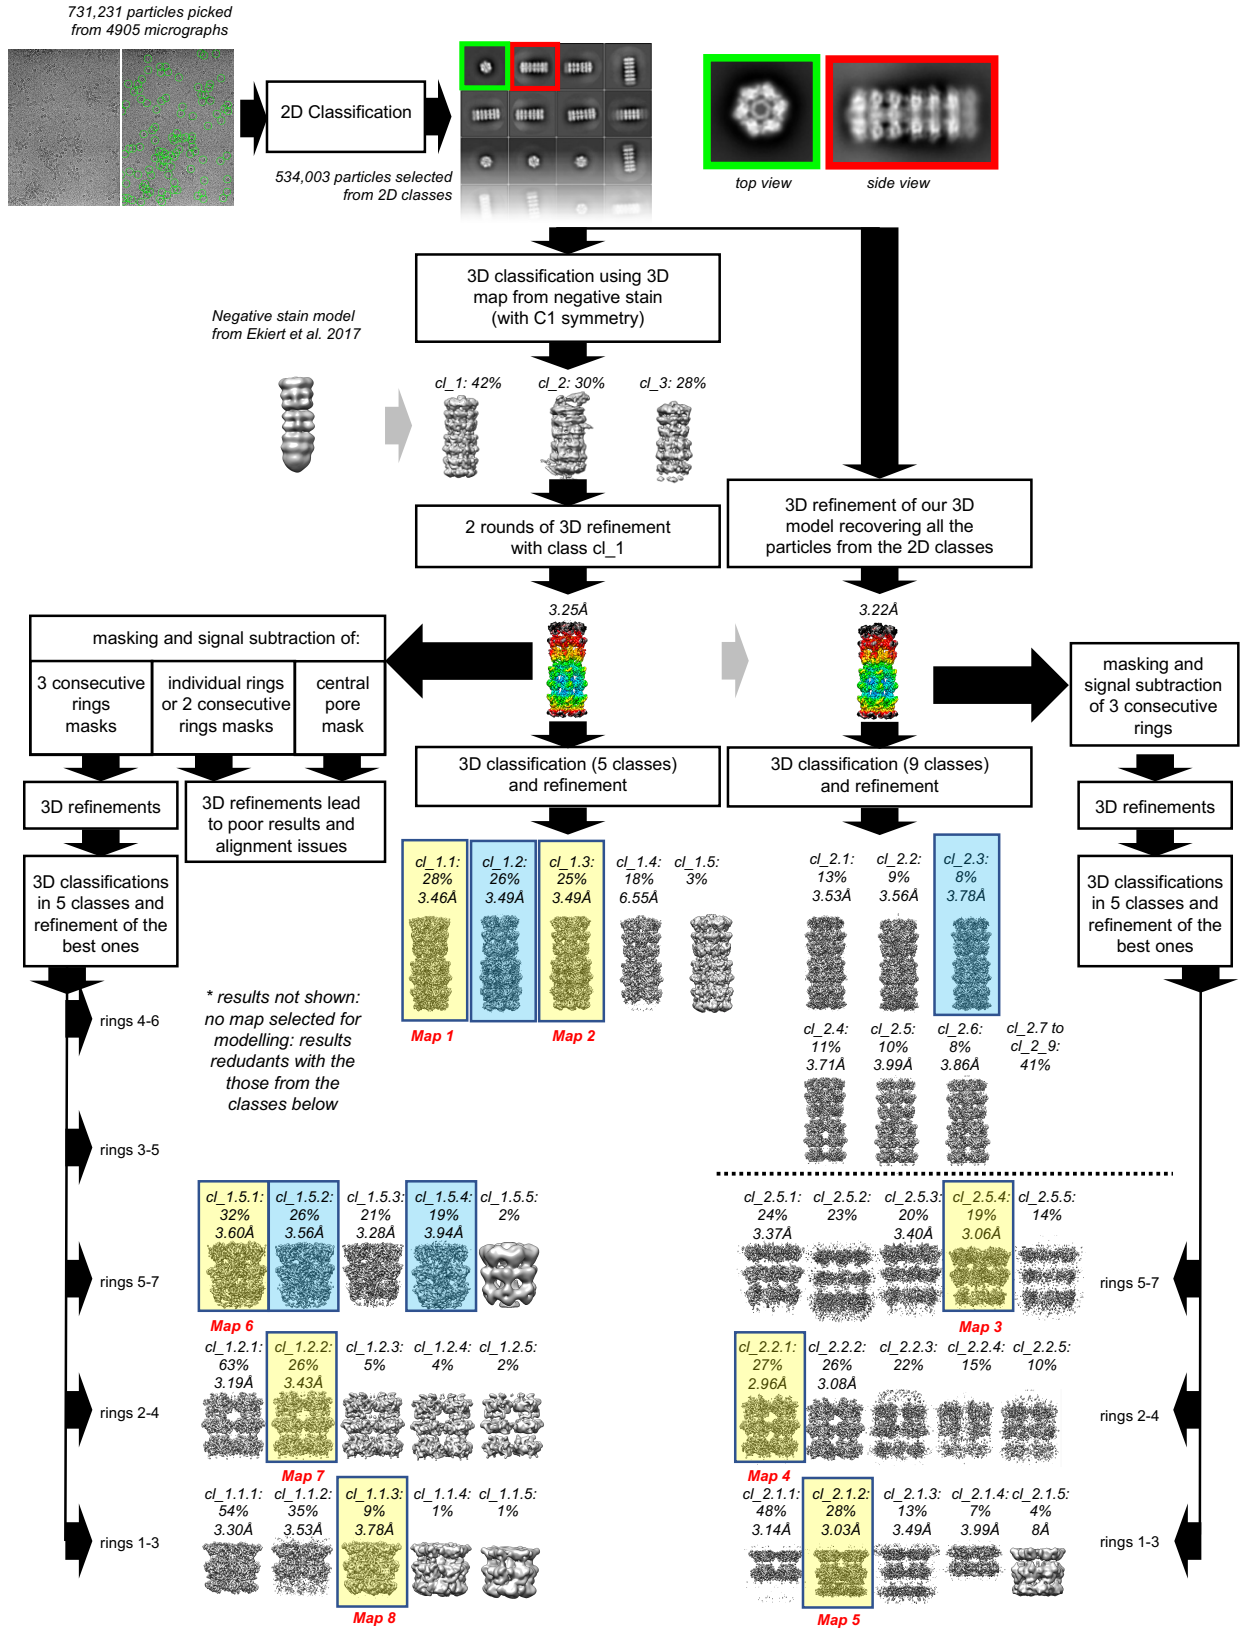

Supplement: NIHMS1587791-supplement-3.pdf [file NIHMS1587791-supplement-3.pdf]

Figure S3

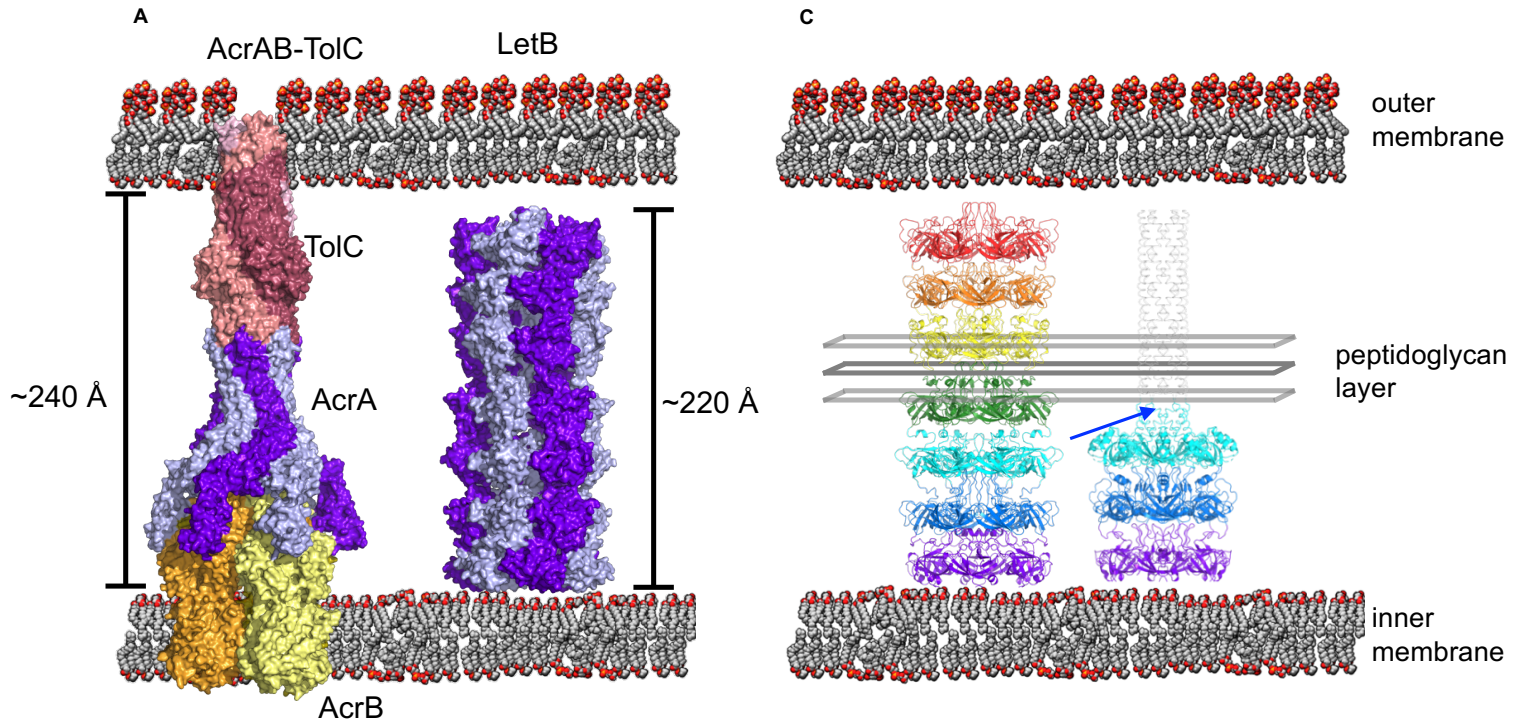

**B**

class 1 of PqiB  
**Open**

class 2 of PqiB  
**Closed**

movement analysis

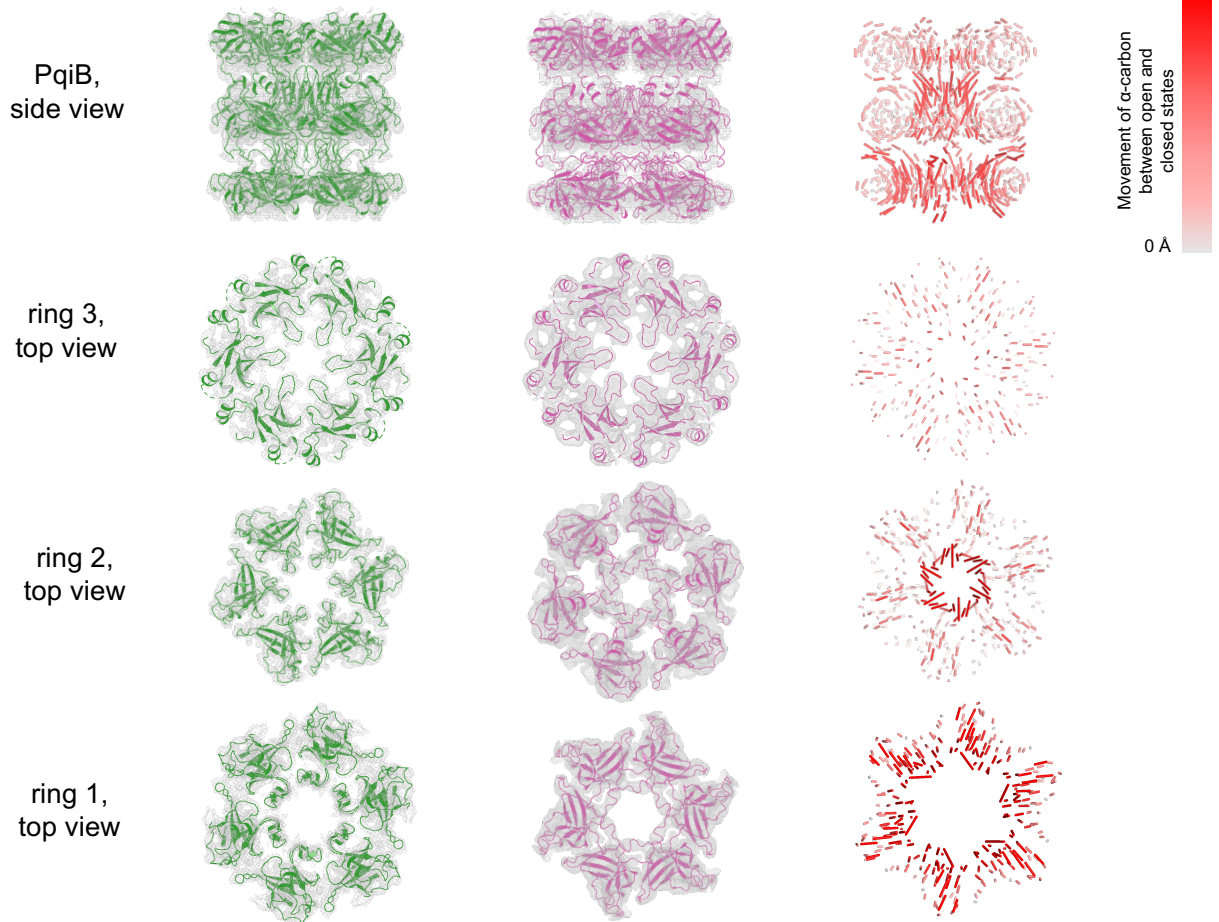

Supplement: NIHMS1587791-supplement-4.pdf [file NIHMS1587791-supplement-4.pdf]

**Figure S4**

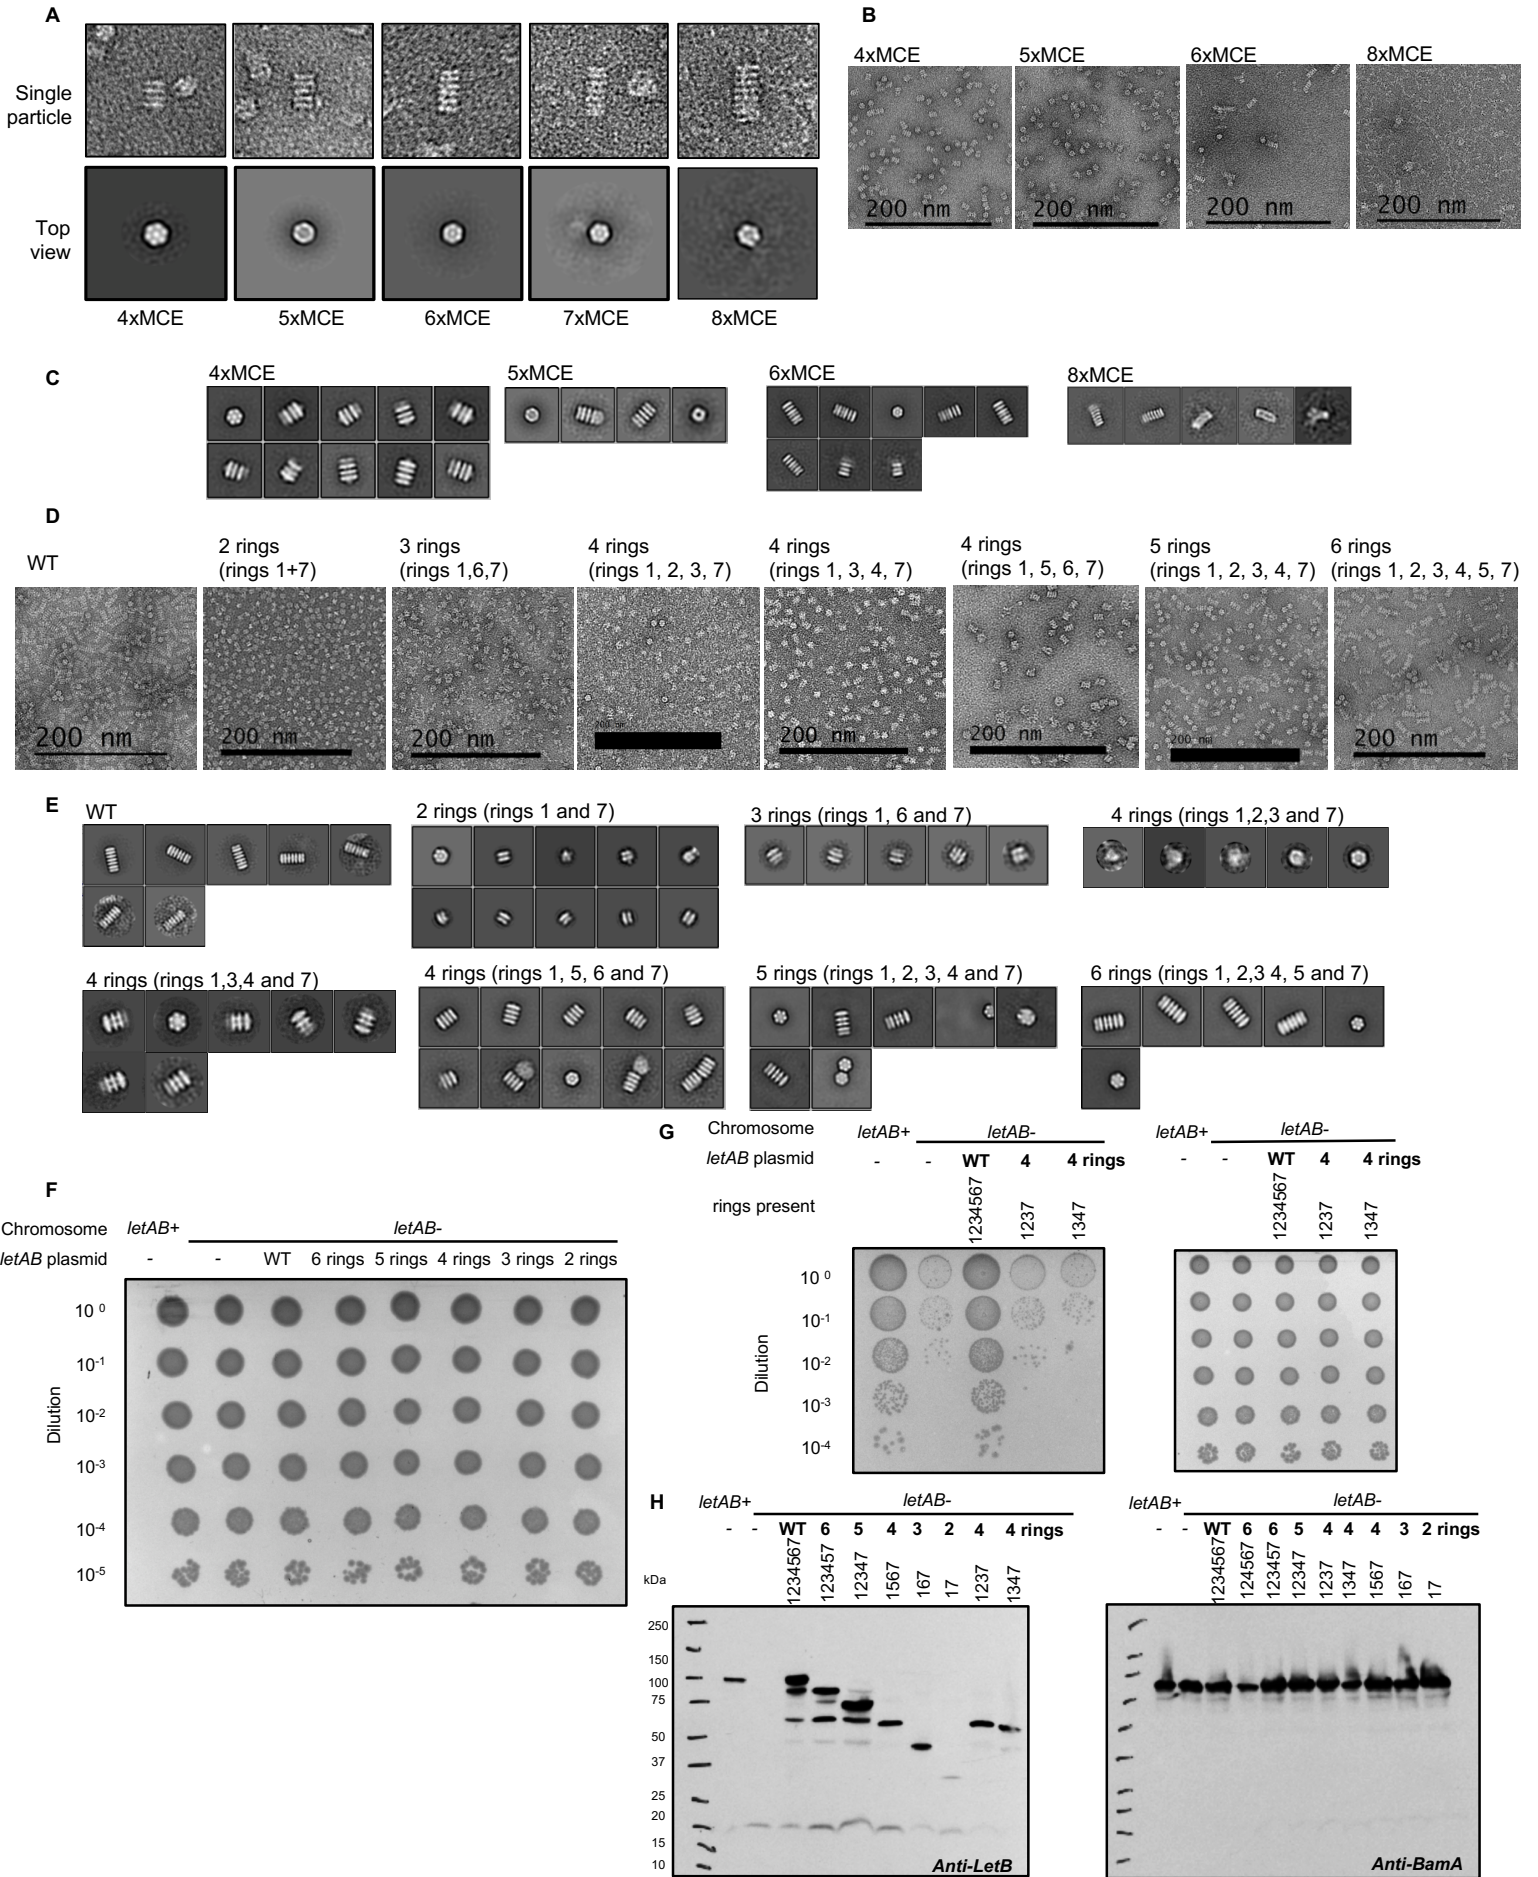

Supplement: NIHMS1587791-supplement-5.pdf [file NIHMS1587791-supplement-5.pdf]

**Figure S5**

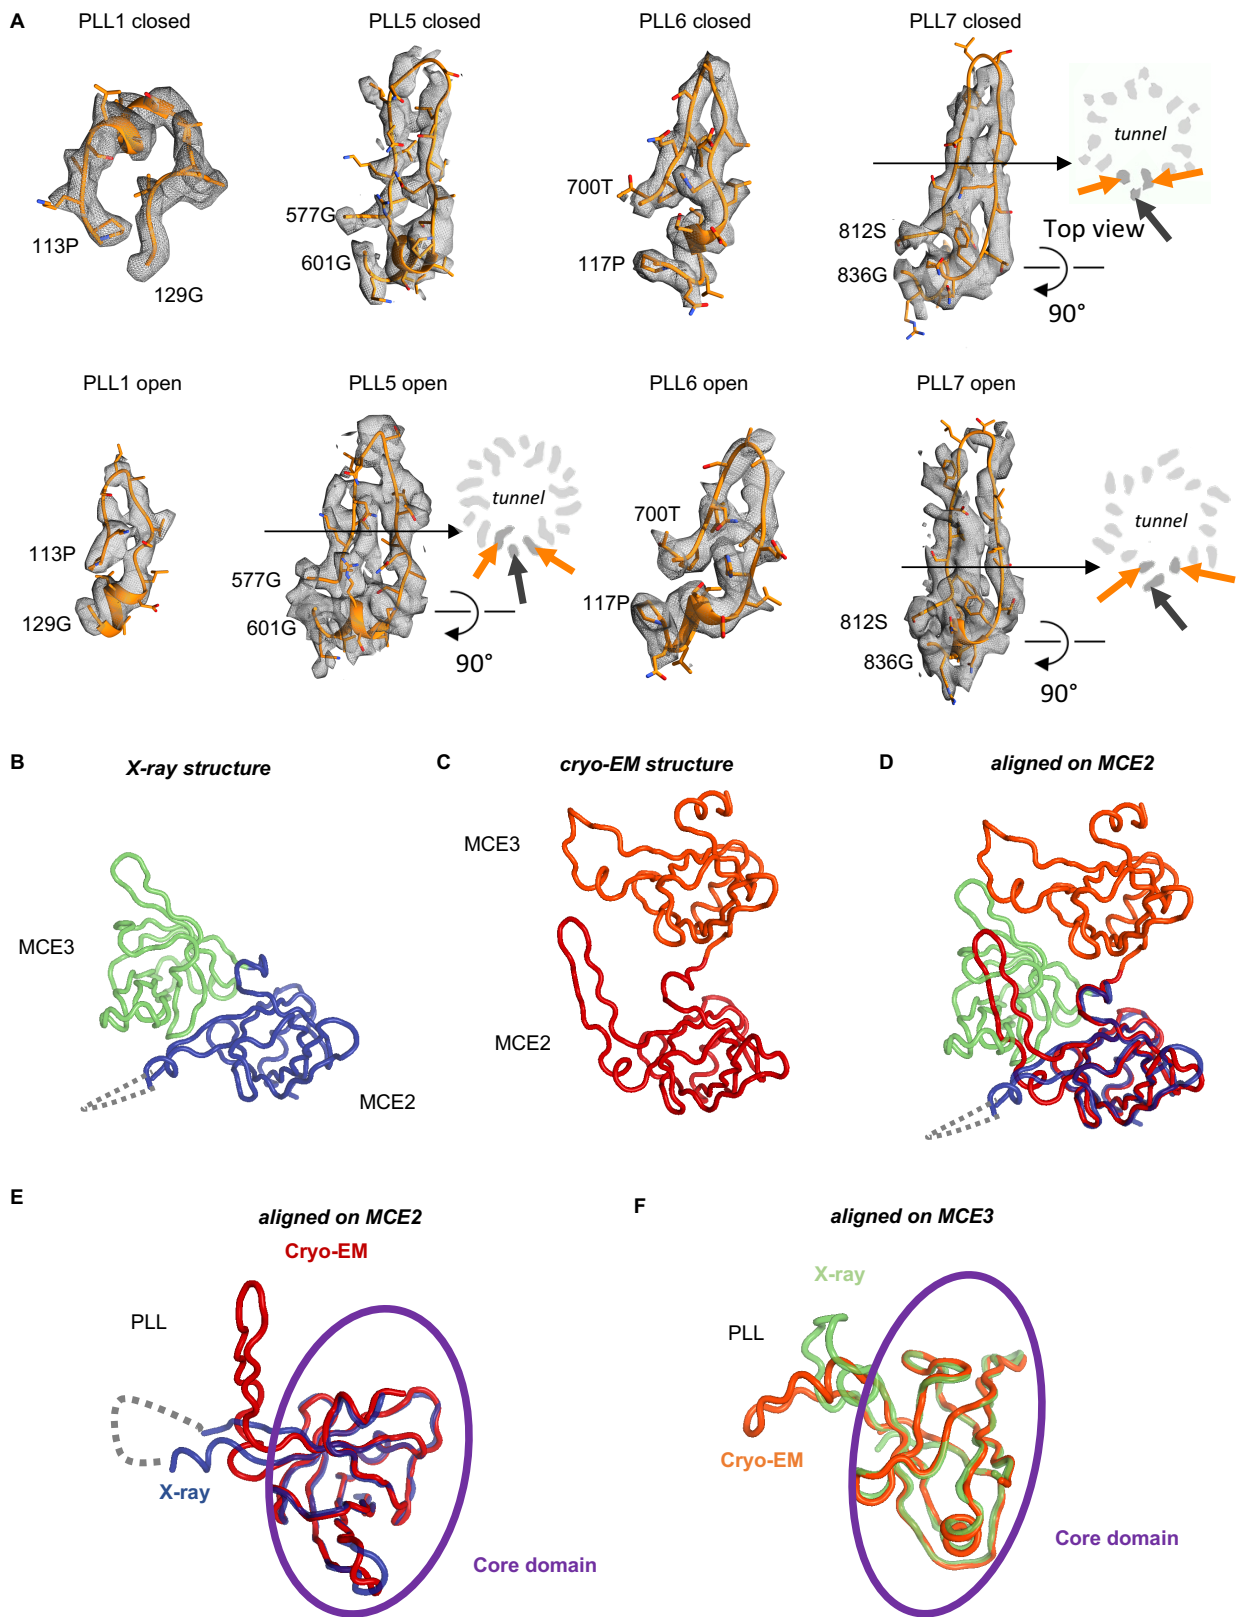

Supplement: NIHMS1587791-supplement-6.pdf [file NIHMS1587791-supplement-6.pdf]

**Figure S6**

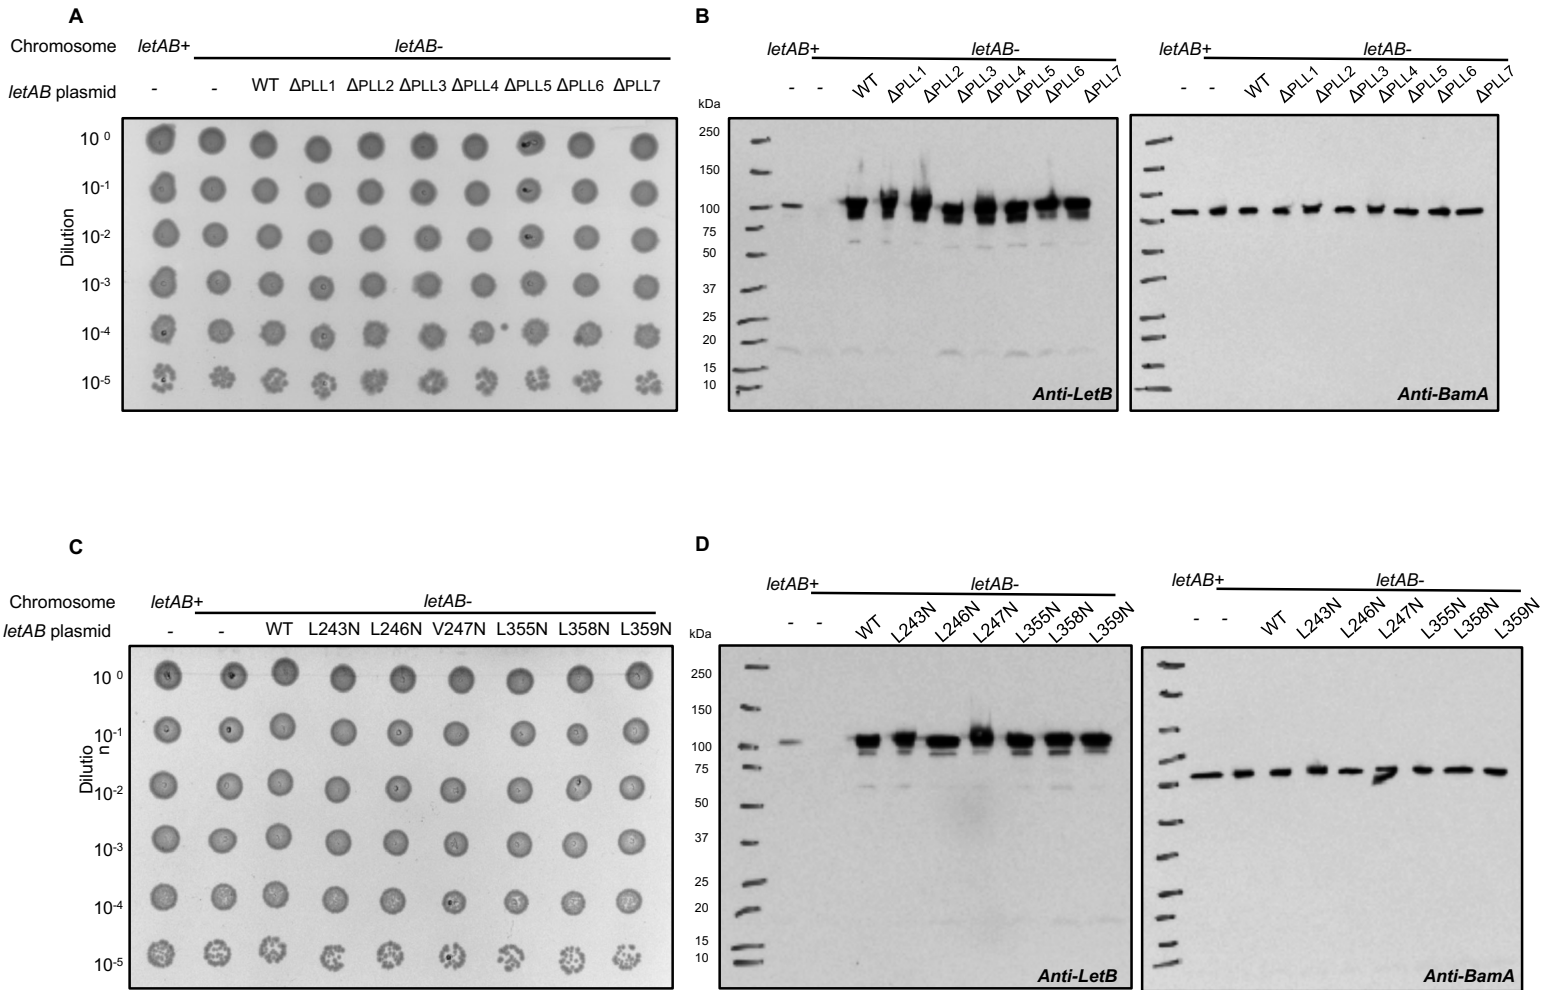

Supplement: NIHMS1587791-supplement-7.pdf [file NIHMS1587791-supplement-7.pdf]
